# Supplementary material for: Iridium–Schiff base complex-based fluorimetric turn-off sensor and HPLC-DAD analytical approaches for quantitation of 8-hydroxy-2′-deoxyguanosine as an oxidative DNA damage biomarker in biofluids of healthy and diabetic subjects
Source: Royal Society of Chemistry journal article supplement (doi:10.1039/d6ra02144a), 2026-05-28
Supplement: d6ra02144a1.pdf [file d6ra02144a1.pdf]

**Iridium–Schiff Base complex- Based Fluorimetric Turn-Off Sensor and HPLC-DAD Analytical Approaches for Quantitation of 8-Hydroxy-2'-Deoxyguanosine as an Oxidative DNA Damage Biomarker in Biofluids of Healthy and Diabetic Subjects**

Hazim M. Ali<sup>1\*</sup>, Tamer H.A. Hasanin<sup>1</sup>, Ahmed Hamad Alanazi<sup>1</sup>, Emad Manni<sup>2</sup>, Moamen S. Refat<sup>3</sup>, Azza H. Rageh<sup>4</sup>, Mohammed Gamal<sup>5\*</sup>

<sup>1</sup>Department of Chemistry, College of Science, Jouf University, P.O. Box 2014, Sakaka, Aljouf, Saudi Arabia

<sup>2</sup>Department of Clinical Laboratory Sciences, college of applied medical sciences, Jouf University

<sup>3</sup>Department of Chemistry, College of Science, Taif University, P.O. Box 11099, Taif, 21944, Saudi Arabia

<sup>4</sup>Department of Pharmacognosy and Pharmaceutical Chemistry, College of Pharmacy, Taibah University, Al-Madinah Al-Munawarah 30001, Saudi Arabia

<sup>5</sup>Department of Pharmaceutical Analytical Chemistry, Faculty of Pharmacy, Beni-Suef University, Alshaheed Shehata Ahmed Hegazy St., Beni-Suef 62574, Egypt

\*Correspondence: [hmali@ju.edu.sa](mailto:hmali@ju.edu.sa) (Hazim M. Ali), [mgamalm3000@yahoo.com](mailto:mgamalm3000@yahoo.com)

(Mohammed Gamal)

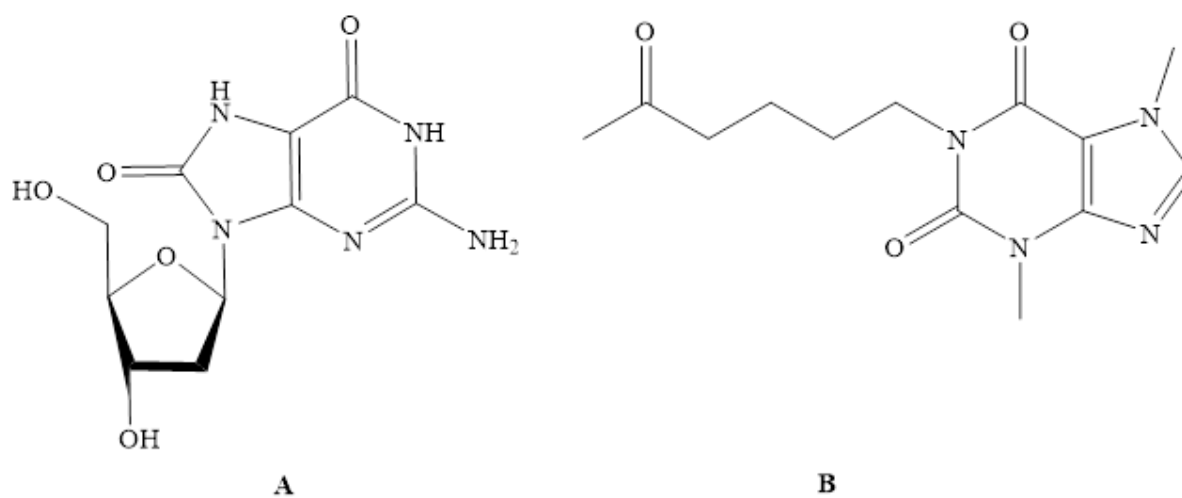

**Supplementary scheme 1:** chemical structure of (A) 8-OHdG and (B) pentoxifylline

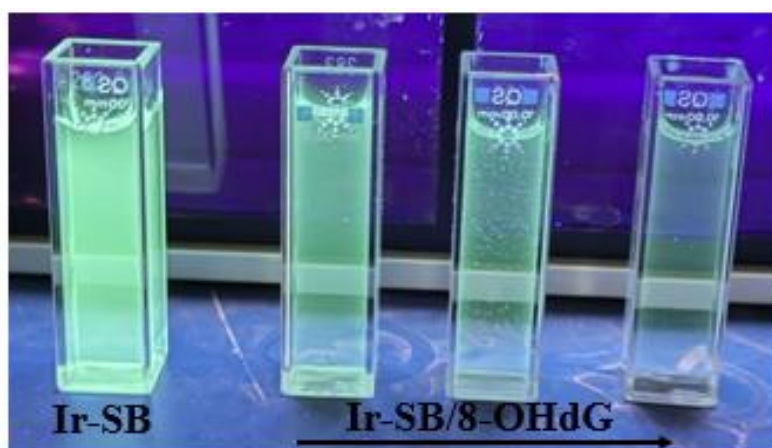

**Fig. S1.** Image shows the effect of UV excitation at  $\lambda = 254$  nm on the working system. From right to left: Ir-SB complex, and Ir-SB complex -8-OHdG.

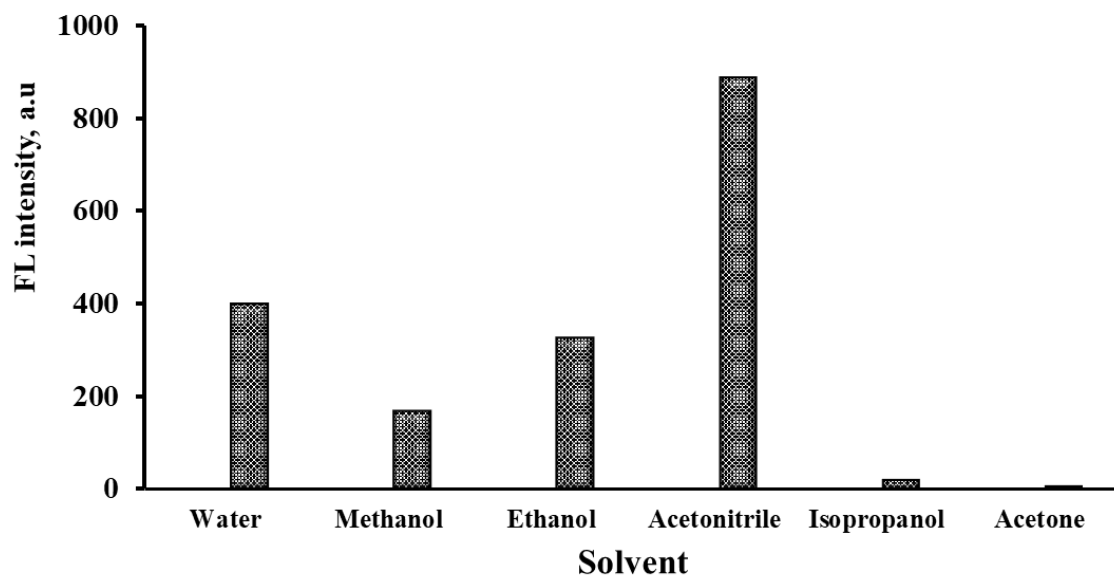

**Fig. S2.** Fluorescence intensities of Ir-SB complex at  $\lambda_{\text{ex}} = 292$  nm in the presence of different solvents.

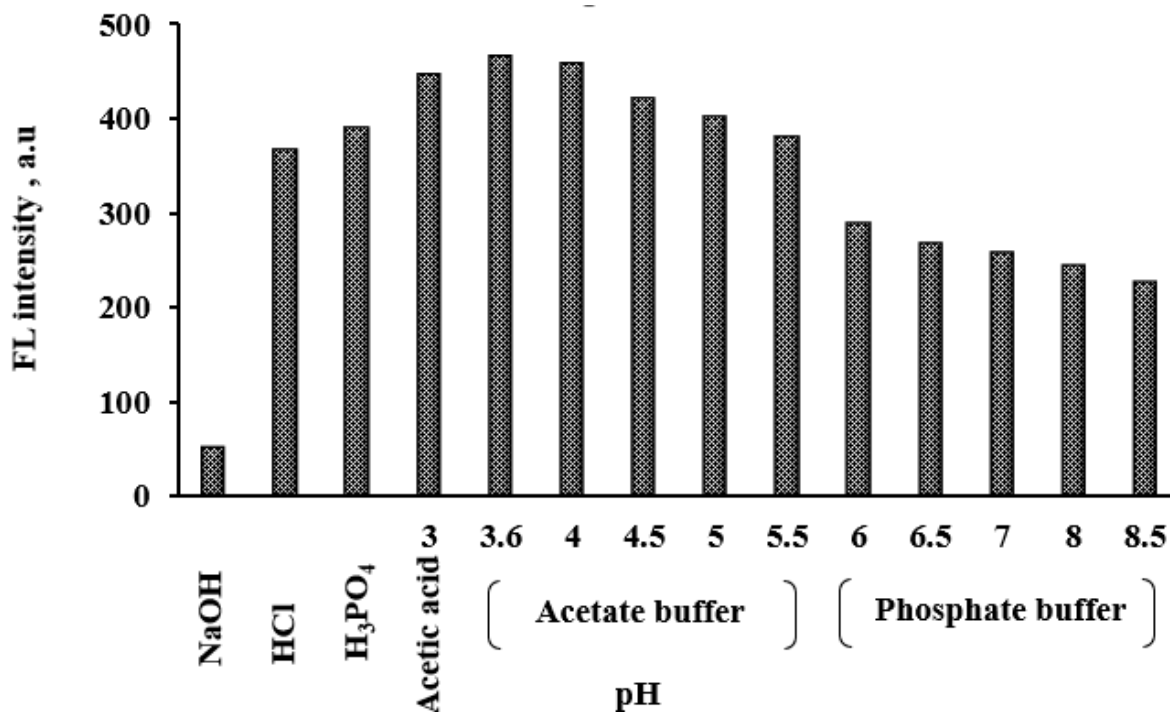

**Fig. S3.** Fluorescence intensities of the Ir-SB complex fluorophore in the presence of different medium at  $\lambda_{\text{ex}} = 292$  nm.

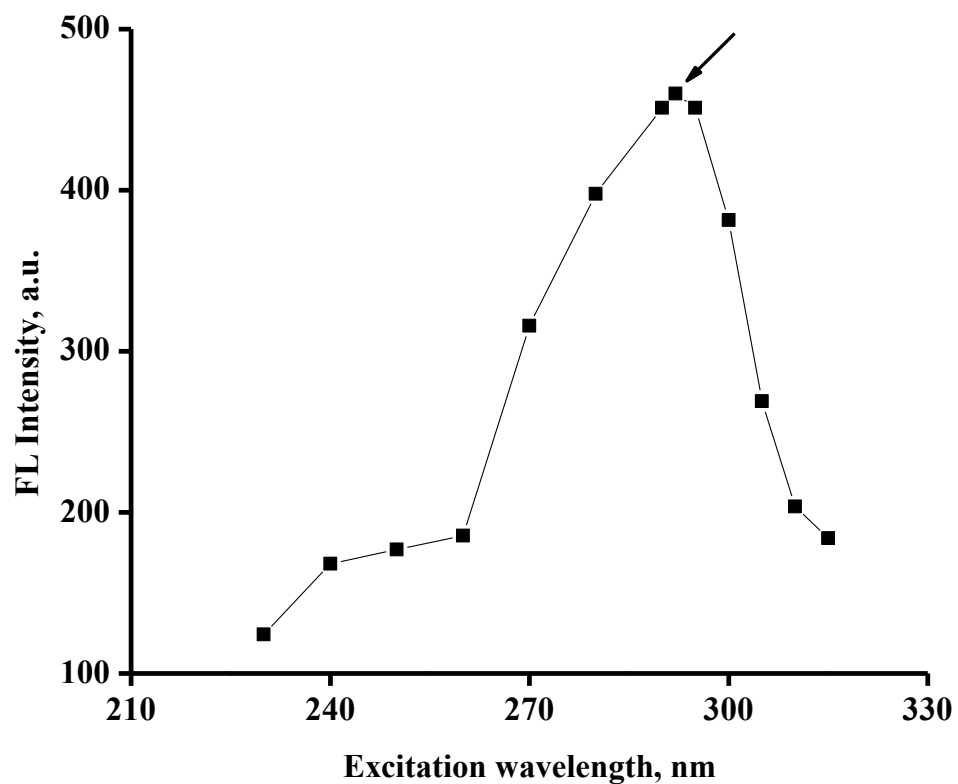

Fig. S4. Fluorescence spectra of Ir-SB complex at different excitation wavelengths.

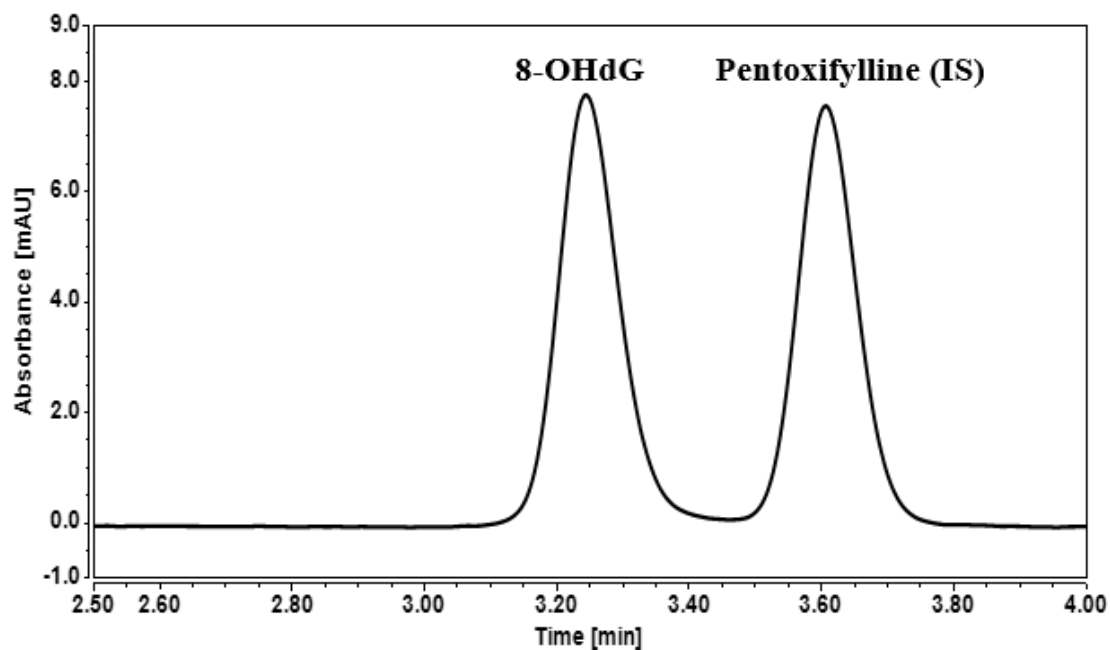

Fig. S5. HPLC-DAD chromatogram of 8-OHdG in presence of pentoxifylline as internal standard

**Table S1:** System suitability testing parameters of the proposed HPLC method.

| Parameters                      | Obtained value |                | Reference value [33]                                         |
|---------------------------------|----------------|----------------|--------------------------------------------------------------|
|                                 | 8-OHdG         | pentoxifylline |                                                              |
| Resolution ( $R_s$ )            | 4.36           |                | > 1.5                                                        |
| Selectivity factor ( $\alpha$ ) | 1.11           |                | > 1                                                          |
| Tailing factor(T)               | 1.02           | 1.05           | < 1.5-2 or <2                                                |
| Capacity factor( $K'$ )         | 1.70           | 2.01           | 1 – 10 acceptable                                            |
| Column efficiency<br>(N)        | 18900          | 19800          | Increase with<br>efficiency of the<br>separation             |
| HETP <sup>b</sup>               | 0.0079         | 0.0076         | The smaller the value<br>the higher the column<br>efficiency |

HETP<sup>b</sup> = height equivalent to theoretical plate, (cm / plate)

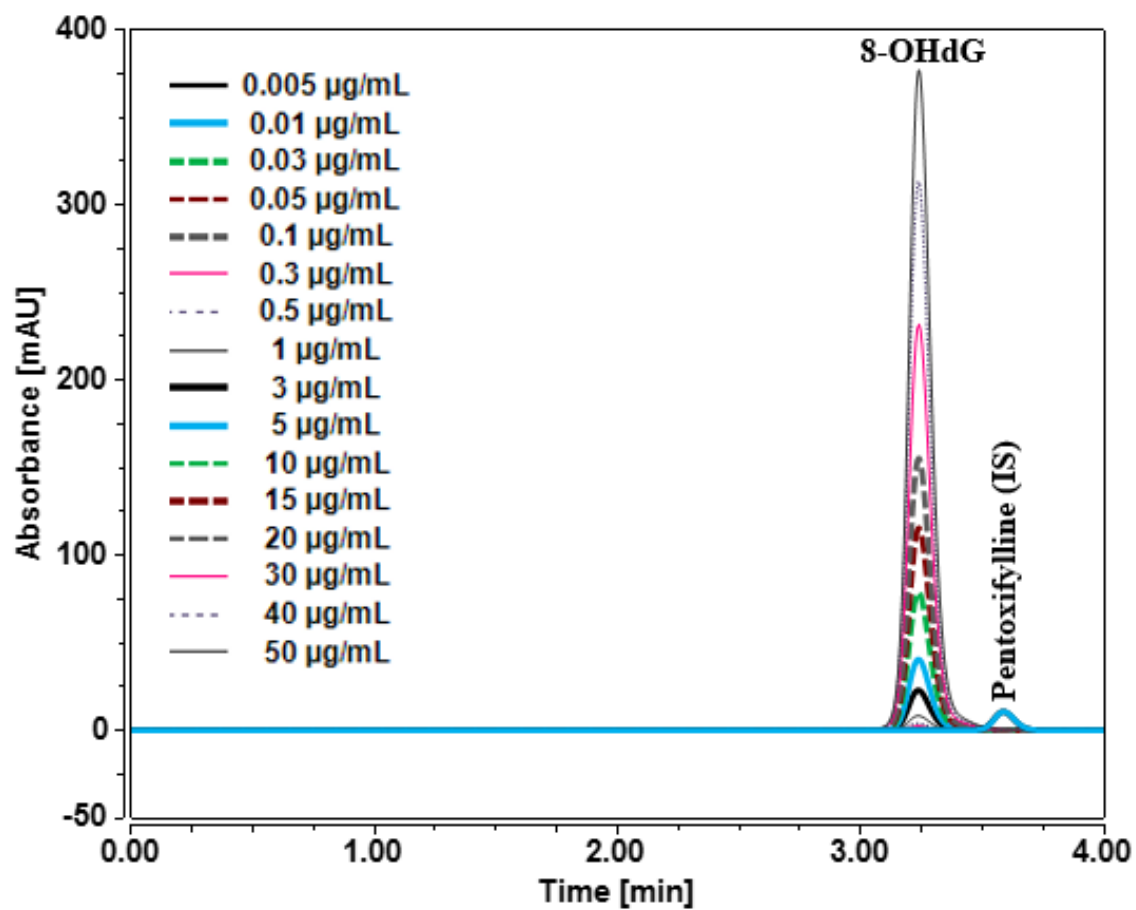

**Fig. S6.** HPLC-DAD chromatogram of different concentration of 8-OHdG in presence of pentoxifylline as internal standard

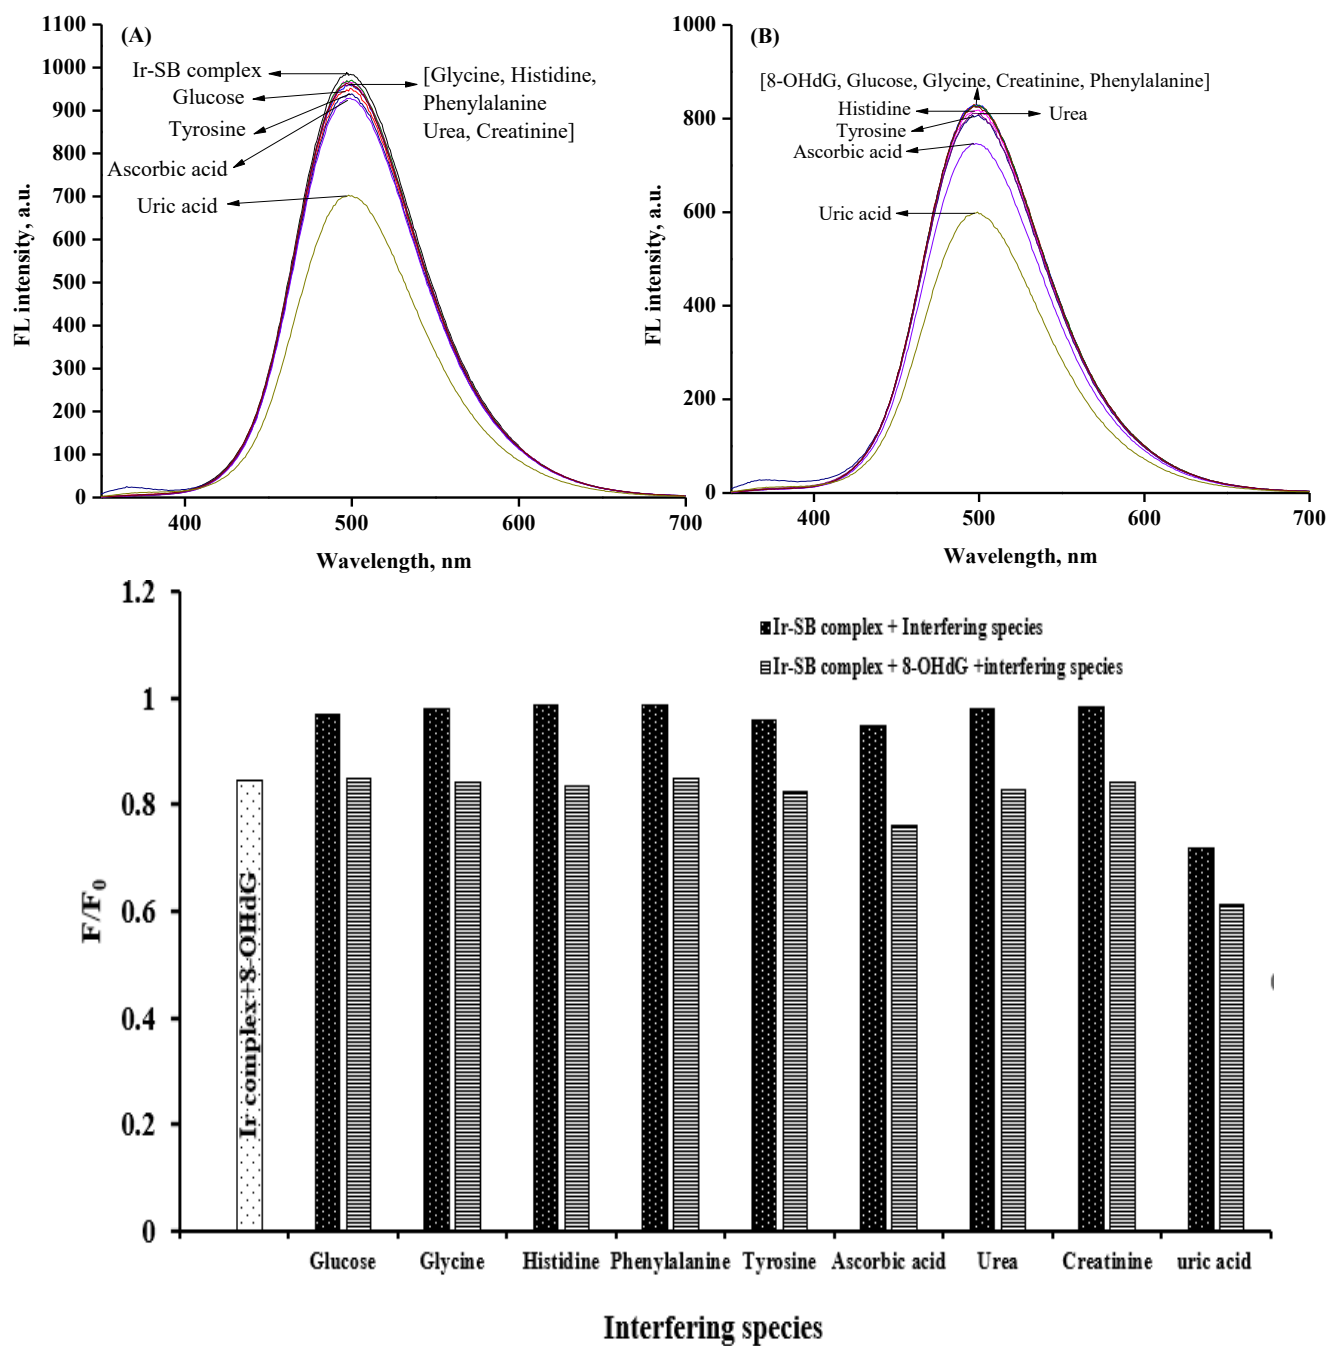

**Fig. S7:** A) and B) effect of interfering species on the fluorescence intensity of Ir-SB complex and Ir-SB complex in the presence of 8-OHdG. C) The  $F_0/F$  ratio of Ir-SB complex (Black bars) and Ir-SB complex -8-OHdG (Grey bars) in the absence and presence of interfering species. The used concentration: Ir-SB complex= 0.215  $\mu\text{g/mL}$ ; [8-OHdG] = 5  $\mu\text{g/mL}$ ; [Glucose], [Glycine], [Histidine], [Phenylalanine], [Tyrosine], [Ascorbic acid], [Urea], [creatinine]= 40  $\mu\text{g/mL}$ ; [uric acid] = 5  $\mu\text{g/mL}$ .

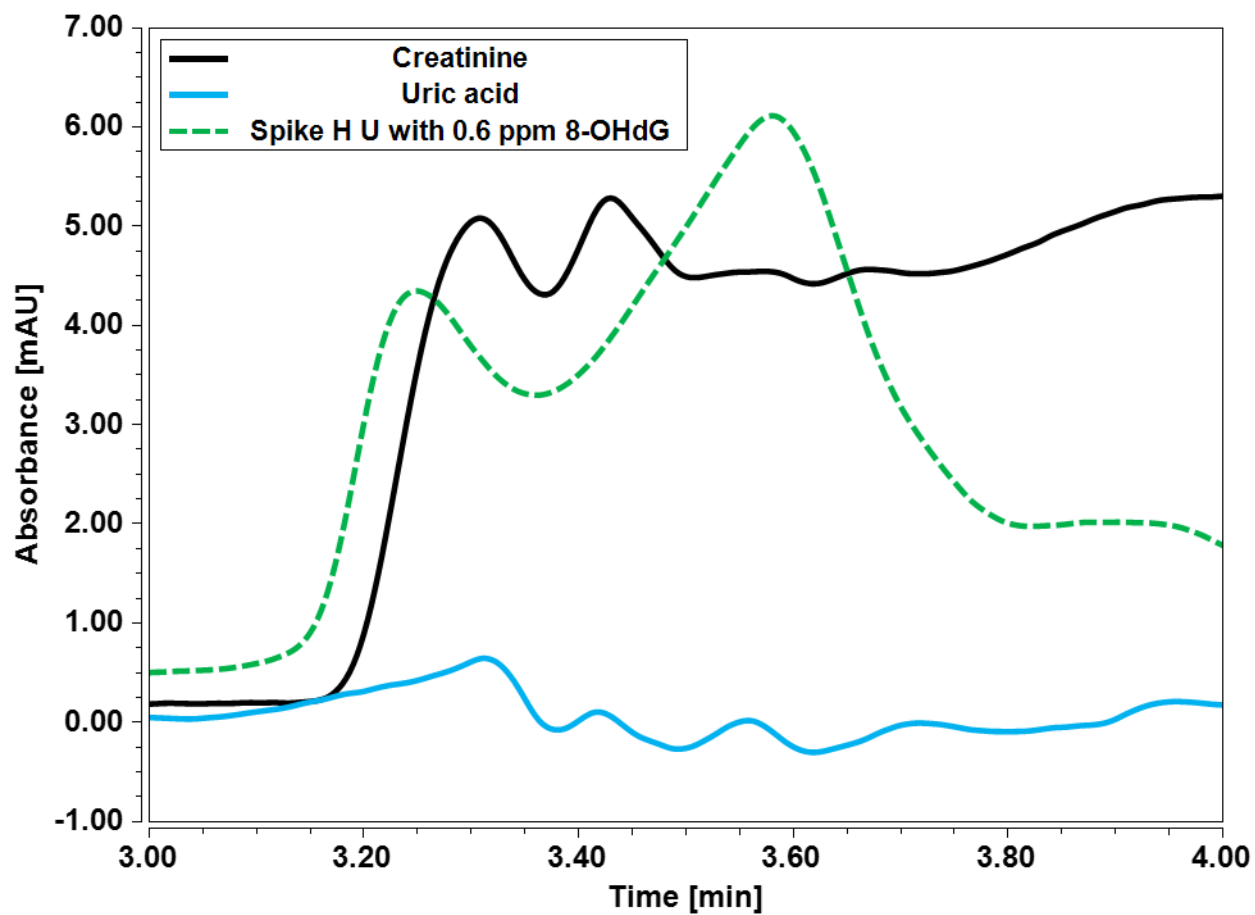

**Fig. S8:** HPLC Chromatogram of creatinine, uric acid and healthy urine spiked with 0.6  $\mu\text{g/mL}$  8-OHdG.

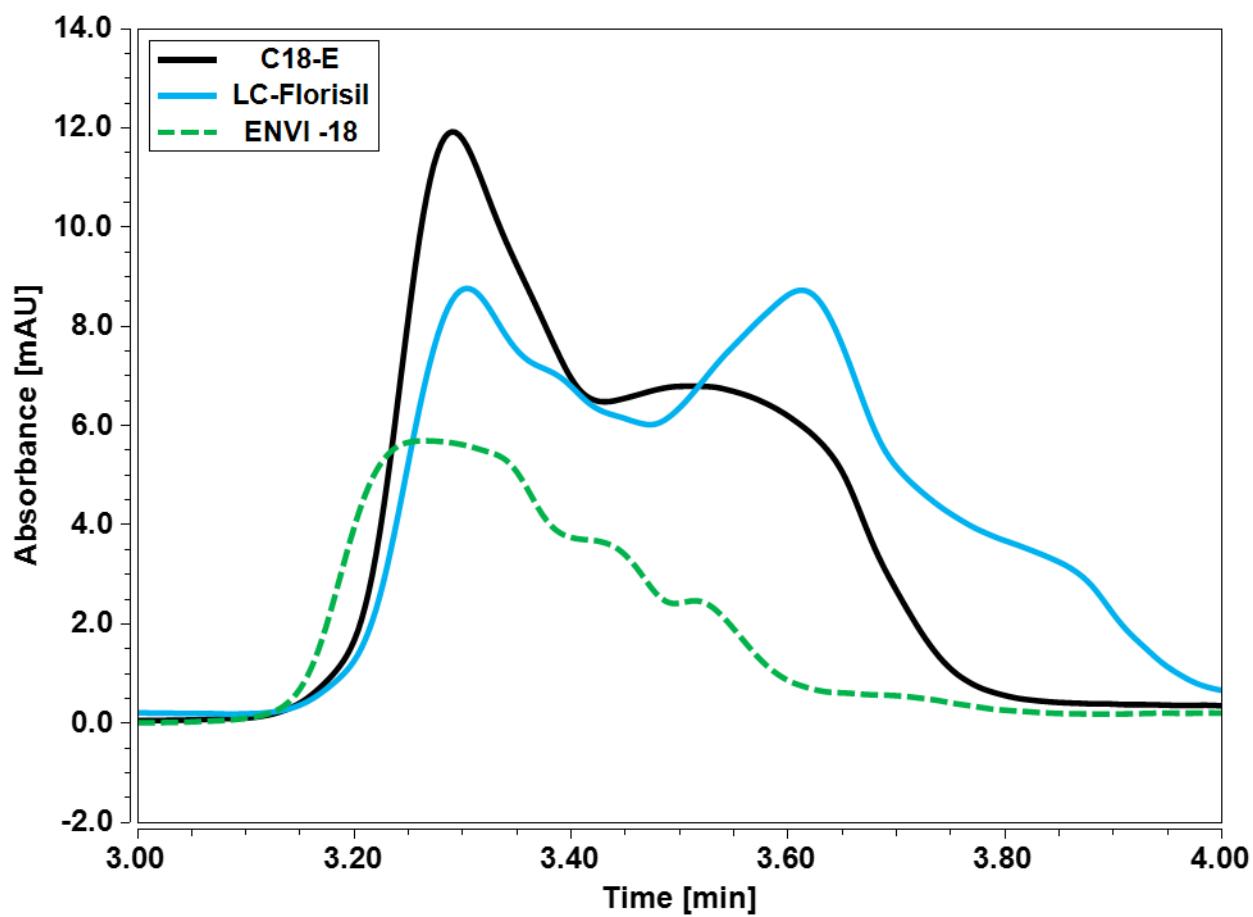

Fig. S9. HPLC chromatogram of extracted 8-OHdG by using different SPE cartridge

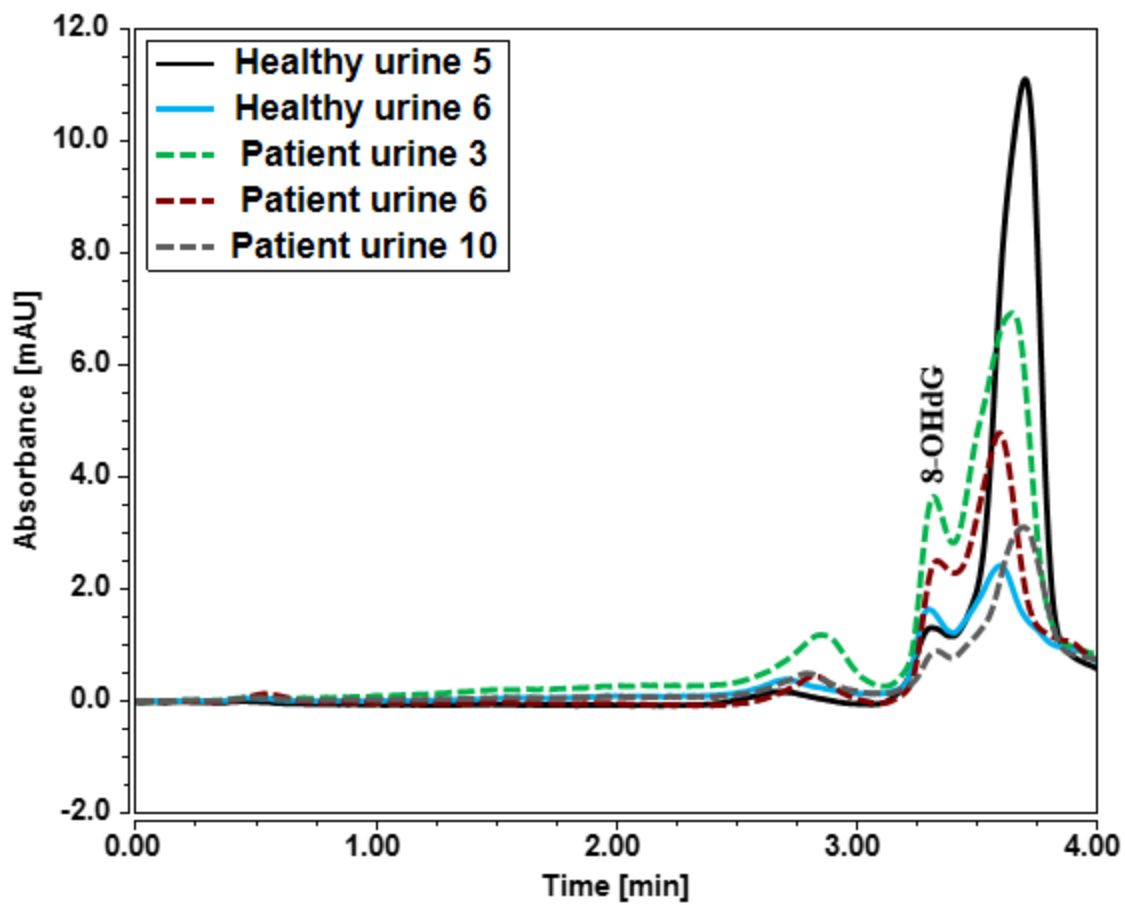

**Fig. S10.** HPLC chromatogram of 8-OHdG in urine samples of healthy and diabetic patient's volunteers

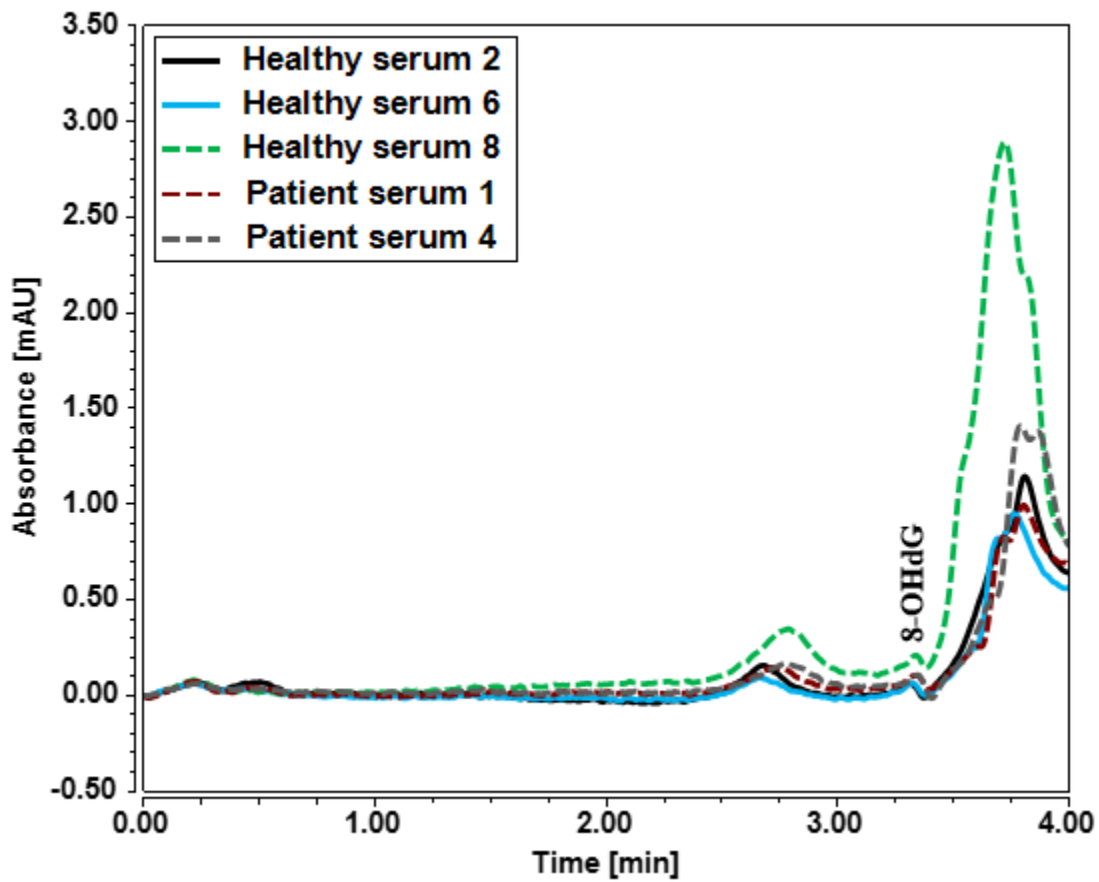

**Fig.S11.** HPLC chromatogram of 8-OHdG in serum samples of healthy and diabetic patient's volunteers

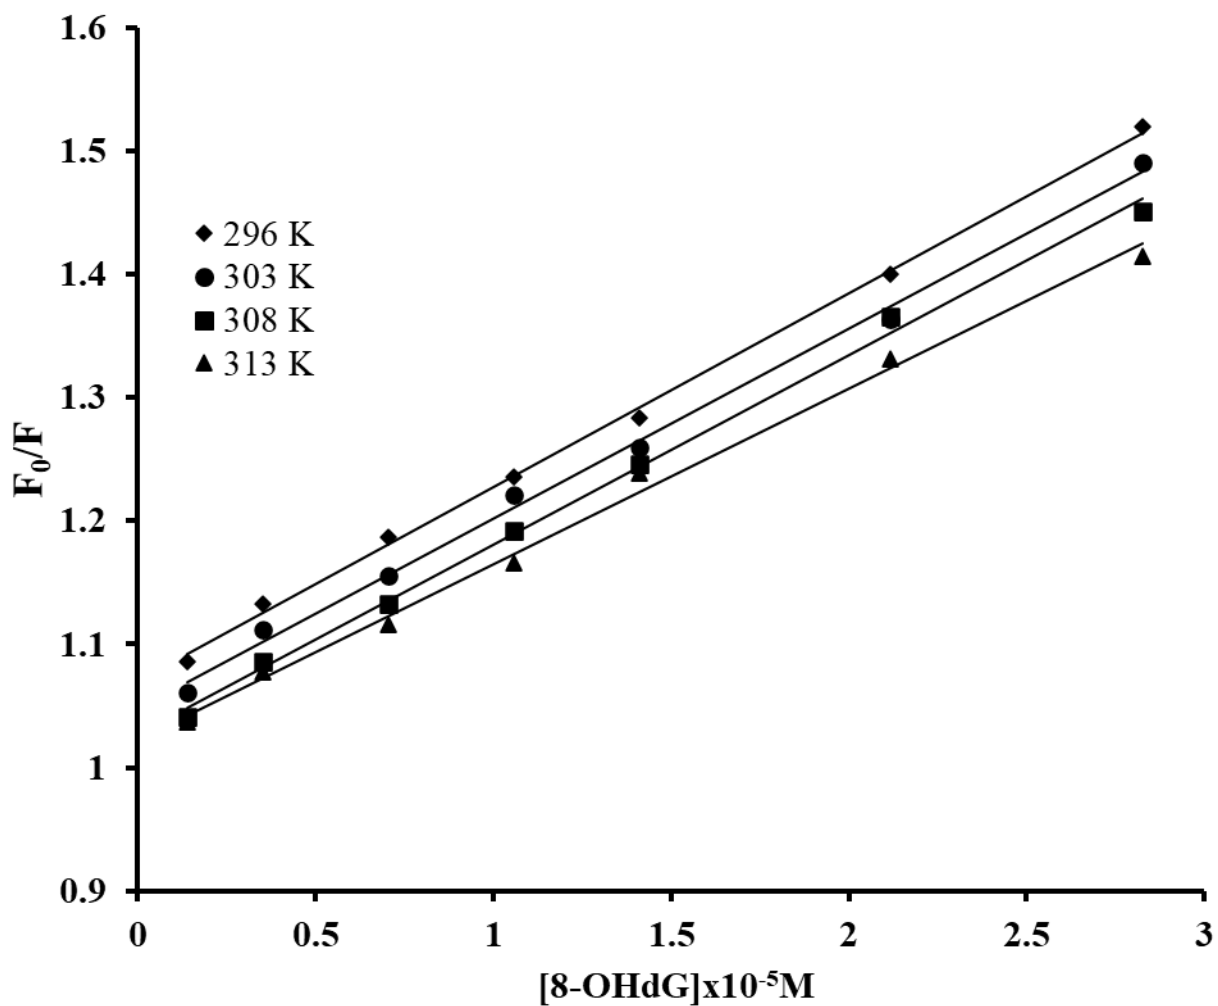

**Fig. S12.** Stern–Volmer plots for the Ir-SB-8-OHdG system at four different temperatures; (Working parameters: [Ir-SB] = 0.2  $\mu\text{g/mL}$ , [8-OHdG] = 0.141 – 2.82  $\times 10^{-5}$   $\mu\text{g/mL}$ ;  $\lambda_{\text{ex}}$  = 292 nm).

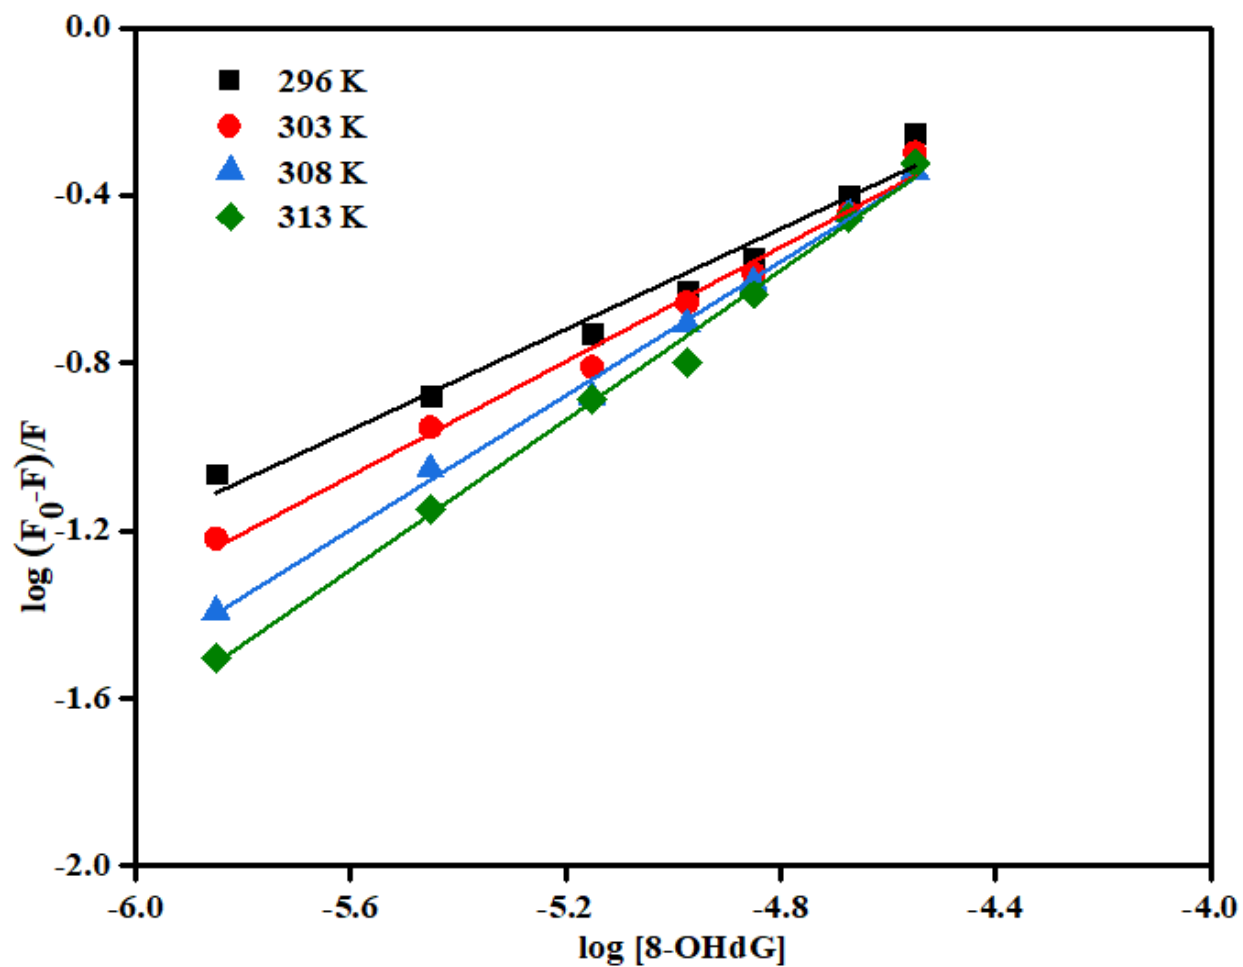

Fig. S13. The plots of  $\log(F_0-F)/F$  versus  $\log[8\text{-OHdG}]$  at four different temperatures

**Table S2. Thermodynamic parameters for the interaction between Ir-SB and 8-OHdG**

| T (K) | 1/T (K <sup>-1</sup> ) | K <sub>a</sub> (M <sup>-1</sup> ) | ln K <sub>a</sub> | ΔG° (kJ mol <sup>-1</sup> ) | ΔH° (kJ mol <sup>-1</sup> ) | ΔS° (J mol <sup>-1</sup> K <sup>-1</sup> ) |
|-------|------------------------|-----------------------------------|-------------------|-----------------------------|-----------------------------|--------------------------------------------|
| 296   | 0.00338                | 2.52 × 10 <sup>2</sup>            | 5.529             | -13.61                      |                             |                                            |
| 303   | 0.00330                | 5.66 × 10 <sup>2</sup>            | 6.339             | -15.97                      |                             |                                            |
| 308   | 0.00325                | 1.91 × 10 <sup>3</sup>            | 7.555             | -19.35                      | +138.13                     | +511.18                                    |
| 313   | 0.00319                | 5.04 × 10 <sup>3</sup>            | 8.525             | -22.19                      |                             |                                            |

Note: ΔH° and ΔS° were obtained from the van't Hoff plot of ln K<sub>a</sub> versus 1/T. ΔG° was calculated using ΔG° = -RT ln K<sub>a</sub>.

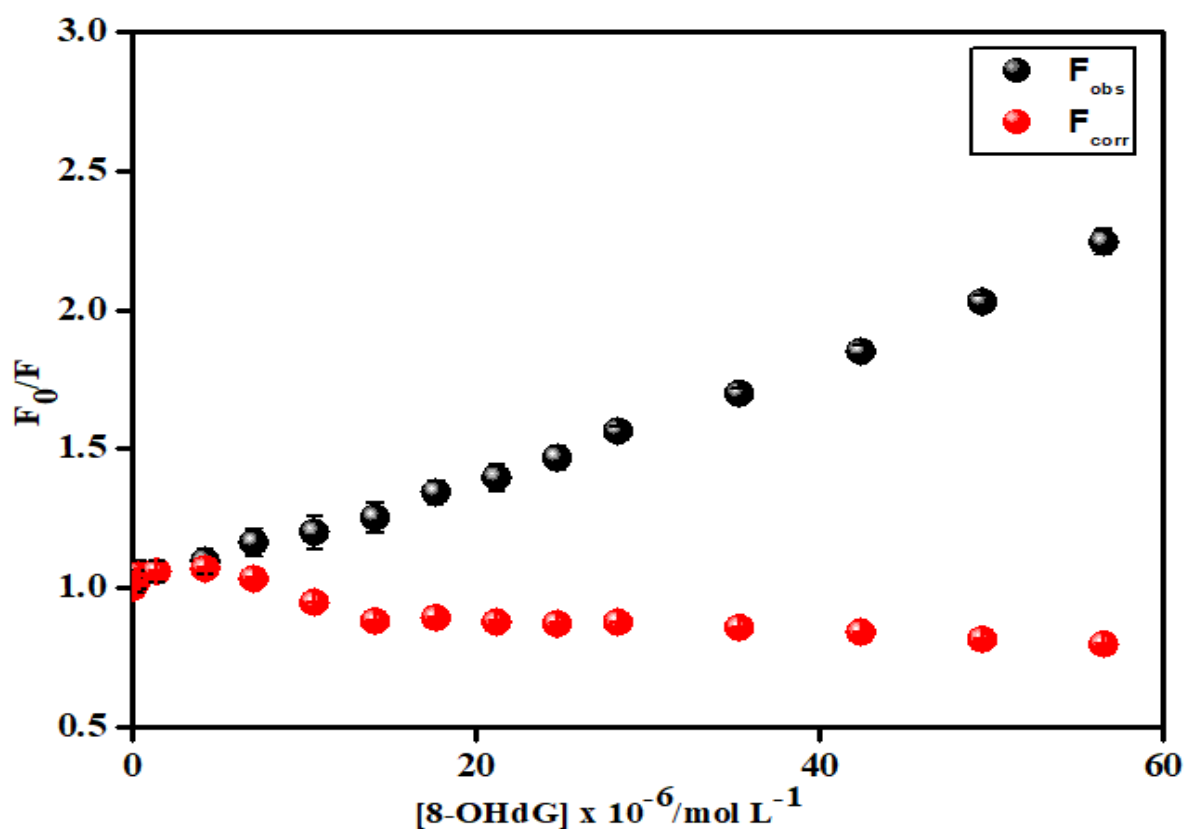

**Fig. S14:** Stern-Volmer relationship between the relative fluorescence intensity ( $F_0/F$ ) and the concentration of 8-OHdG (black dots). Inner filter effect (IFE) – corrected fluorescence intensity versus 8-OHdG concentration (red dots). Each data point is the average of three determinations. Standard deviation is represented as error bars.

**Table S3:** Lakowicz correction parameter

| <b>8-OHdG<br/>(<math>\mu\text{mol L}^{-1}</math>)</b> | <b><math>A_{\text{ex}}</math><br/>(292 nm)</b> | <b><math>A_{\text{em}}</math><br/>(500 nm)</b> | <b>Correction<br/>factor</b> | <b><math>F_{\text{obs}}</math></b> | <b><math>F_{\text{corr}}</math></b> | <b><math>F_{\text{obs},0}/F_{\text{obs}}</math></b> | <b><math>F_{\text{corr},0}/F_{\text{corr}}</math></b> |
|-------------------------------------------------------|------------------------------------------------|------------------------------------------------|------------------------------|------------------------------------|-------------------------------------|-----------------------------------------------------|-------------------------------------------------------|
| 0.00                                                  | 0.000                                          | 0                                              | 1.00                         | 935                                | 935                                 | 1.00                                                | 1.00                                                  |
| 0.09                                                  | 0.000                                          | 0                                              | 1.00                         | 923                                | 926                                 | 1.01                                                | 1.01                                                  |
| 0.18                                                  | 0.000                                          | 0                                              | 1.01                         | 913                                | 918                                 | 1.02                                                | 1.02                                                  |
| 0.35                                                  | 0.000                                          | 0                                              | 1.01                         | 893                                | 903                                 | 1.05                                                | 1.04                                                  |
| 1.41                                                  | 0.000                                          | 0                                              | 1.05                         | 882                                | 922                                 | 1.06                                                | 1.01                                                  |
| 4.24                                                  | 0.022                                          | 0                                              | 1.15                         | 852                                | 980                                 | 1.10                                                | 0.95                                                  |
| 7.06                                                  | 0.103                                          | 0                                              | 1.26                         | 803                                | 1014                                | 1.17                                                | 0.92                                                  |
| 10.59                                                 | 0.205                                          | 0                                              | 1.42                         | 778                                | 1105                                | 1.20                                                | 0.85                                                  |
| 14.12                                                 | 0.306                                          | 0                                              | 1.60                         | 745                                | 1190                                | 1.25                                                | 0.79                                                  |
| 17.66                                                 | 0.355                                          | 0                                              | 1.69                         | 695                                | 1174                                | 1.35                                                | 0.80                                                  |
| 21.19                                                 | 0.404                                          | 0                                              | 1.79                         | 669                                | 1195                                | 1.40                                                | 0.78                                                  |
| 24.72                                                 | 0.453                                          | 0                                              | 1.89                         | 637                                | 1203                                | 1.47                                                | 0.78                                                  |
| 28.25                                                 | 0.502                                          | 0                                              | 2.00                         | 598                                | 1195                                | 1.57                                                | 0.78                                                  |
| 35.31                                                 | 0.594                                          | 0                                              | 2.22                         | 550                                | 1222                                | 1.70                                                | 0.77                                                  |
| 42.37                                                 | 0.686                                          | 0                                              | 2.47                         | 505                                | 1247                                | 1.85                                                | 0.75                                                  |
| 49.44                                                 | 0.792                                          | 0                                              | 2.79                         | 461                                | 1286                                | 2.03                                                | 0.73                                                  |
| 56.50                                                 | 0.898                                          | 0                                              | 3.15                         | 417                                | 1314                                | 2.25                                                | 0.71                                                  |

# STATISTICAL ANALYSIS REPORT

## 8-OHdG Levels in Healthy vs. Diabetic Patients

**Analysis with "nd" (not detected) explicitly coded as Zero**  
**Data Handling:** All "nd" values coded as 0 (representing below limit of detection)  
**Sample Size:** 40 total (10 healthy serum, 10 patient serum, 10 healthy urine, 10 patient urine)

### 1. EXECUTIVE SUMMARY

This analysis explicitly treats all non-detected ("nd") values as **zero**, representing concentrations below the analytical limit of detection (LOD). This is the standard conservative approach in biomarker analysis.

#### Key Findings with nd = 0:

- **Diabetic patients show significantly elevated 8-OHdG** in all comparisons ( $p < 0.05$ )
- **Urine demonstrates dramatic elevation:**  $\sim 32\text{-}34\times$  higher mean levels in diabetics
- **Serum shows moderate elevation:**  $\sim 1.8\times$  higher (HPLC) or emergence from zero baseline (FL)
- **HPLC-DAD is substantially more sensitive** than FL, particularly for serum analysis (100% vs 50% detection rate in patients)
- **Excellent method correlation** ( $r > 0.90$ ) confirms both methods measure the same analyte

### 2. DESCRIPTIVE STATISTICS (nd = 0)

Table 1: 8-OHdG Concentrations by Sample Type, Group, and Method

Table

| Sample | Group   | Method   | N  | Mean<br>( $\mu\text{g/mL}$ ) | SD     | Median | Detected/N | Rate          |
|--------|---------|----------|----|------------------------------|--------|--------|------------|---------------|
| Serum  | Healthy | FL       | 10 | 0.0000                       | 0.0000 | 0.0000 | 0/10       | 0.0%          |
|        |         | HPLC-DAD | 10 | 0.0279                       | 0.0195 | 0.0375 | 7/10       | 70.0%         |
|        | Patient | FL       | 10 | 0.0307                       | 0.0326 | 0.0280 | 5/10       | 50.0%         |
|        |         | HPLC-DAD | 10 | 0.0505                       | 0.0095 | 0.0490 | 10/10      | <b>100.0%</b> |
| Urine  | Healthy | FL       | 10 | 0.1135                       | 0.1259 | 0.0845 | 6/10       | 60.0%         |

|         |          |    |        |        |        |       |        |
|---------|----------|----|--------|--------|--------|-------|--------|
|         | HPLC-DAD | 10 | 0.1196 | 0.1186 | 0.0805 | 9/10  | 90.0%  |
| Patient | FL       | 10 | 3.8220 | 5.8612 | 0.3335 | 10/10 | 100.0% |
|         | HPLC-DAD | 10 | 3.8067 | 5.8830 | 0.3080 | 10/10 | 100.0% |

**Critical Observations:**

- **HPLC-DAD detects 8-OHdG in 100% of diabetic patients** in both serum and urine
- **FL fails completely in healthy serum** (0% detection) and only achieves 50% in diabetic serum
- **Urine concentrations are 100-150× higher than serum** in the same patients, making urine the preferred biological matrix

### 3. GROUP COMPARISONS: HEALTHY VS. DIABETIC PATIENTS

**Table 2: Mann-Whitney U Test Results (nd = 0)**

| Sample | Method   | Healthy Mean | Patient Mean | Fold Change           | U-statistic | p-value | Sig. | Effect Size    |
|--------|----------|--------------|--------------|-----------------------|-------------|---------|------|----------------|
| Serum  | FL       | 0.0000       | 0.0307       | Infinite <sup>1</sup> | 25.0        | 0.015   | *    | 0.500 (Medium) |
|        | HPLC-DAD | 0.0279       | 0.0505       | 1.81×                 | 11.0        | 0.003   | **   | 0.780 (Large)  |
| Urine  | FL       | 0.1135       | 3.8220       | 33.67×                | 18.0        | 0.017   | *    | 0.640 (Large)  |
|        | HPLC-DAD | 0.1196       | 3.8067       | 31.83×                | 20.0        | 0.026   | *    | 0.600 (Large)  |

<sup>1</sup> Infinite fold change occurs because healthy mean = 0 (all values non-detectable)

**Interpretation:**

- **Serum HPLC-DAD shows the strongest statistical significance** (p = 0.003) with large effect size (0.78)
- **Urine shows massive quantitative differences** (>30× elevation) though with higher variability (SD ~5.8)
- **All comparisons are statistically significant** at  $\alpha = 0.05$  level
- **Effect sizes are medium to large**, indicating clinically meaningful differences beyond statistical significance

### 4. METHOD COMPARISON: FL VS. HPLC-DAD

**Table 3: Agreement and Correlation Analysis (nd = 0)**

| Parameter                       | Serum                           | Urine                           |
|---------------------------------|---------------------------------|---------------------------------|
| Sample size                     | 20 (17 with $\geq 1$ detection) | 20 (19 with $\geq 1$ detection) |
| Pearson correlation (r)         | 0.902                           | 0.999                           |
| Spearman correlation ( $\rho$ ) | 0.808                           | 0.995                           |
| p-value                         | < 0.0001                        | < 0.0001                        |
| Mean bias (FL - HPLC)           | -0.0238 $\mu\text{g/mL}$        | +0.0046 $\mu\text{g/mL}$        |
| SD of differences               | 0.0218                          | 0.1942                          |
| 95% Limits of Agreement         | [-0.0666, 0.0189]               | [-0.3761, 0.3853]               |
| Wilcoxon signed-rank test       | p = 0.0031 (biased)             | p = 0.9358 (unbiased)           |
| Agreement within $\pm 20\%$     | 40.0% (8/20)                    | 85.0% (17/20)                   |

### Key Findings:

- **Urine: Nearly perfect correlation** ( $r = 0.999$ ) with excellent agreement (85% within  $\pm 20\%$ )
  - **Serum: Strong correlation** ( $r = 0.902$ ) but FL systematically underestimates by  $\sim 0.024 \mu\text{g/mL}$  ( $p = 0.003$ )
  - **Recommendation:** HPLC-DAD is the reference method, especially for serum where FL has poor sensitivity
-

# 8-OHdG Levels in Healthy vs Diabetic Patients (nd = 0)

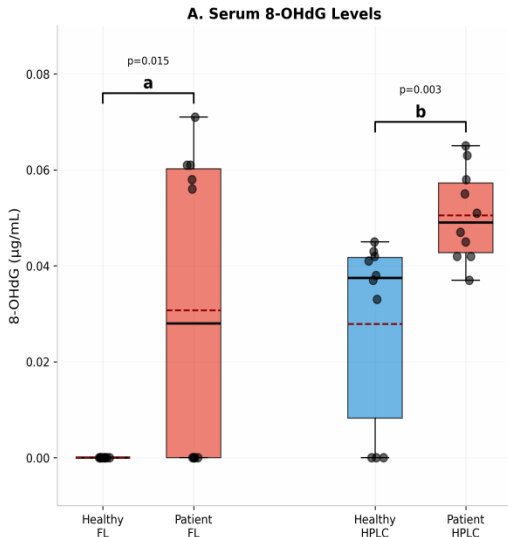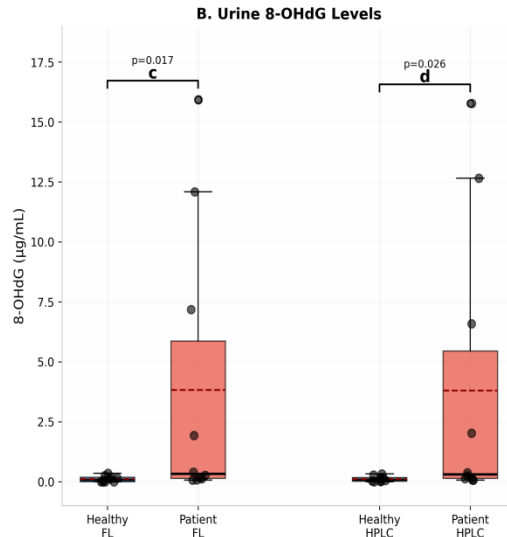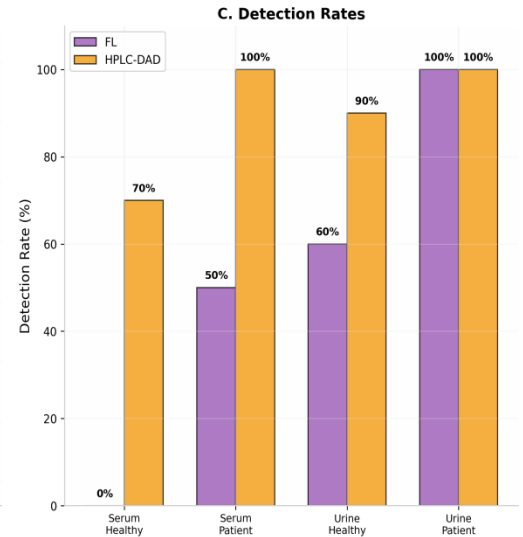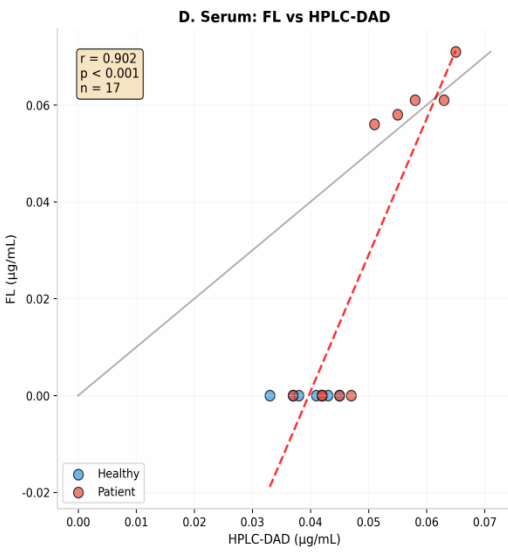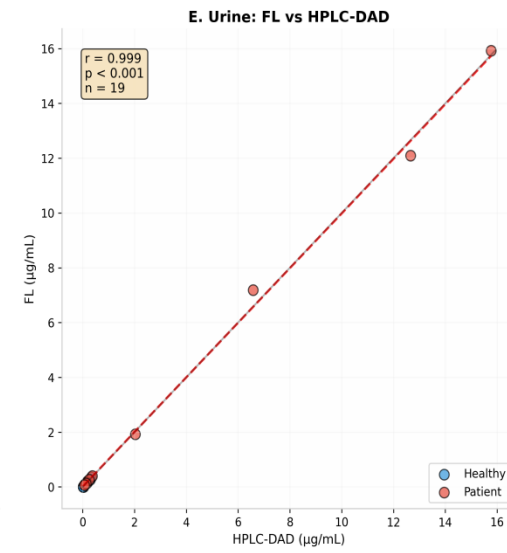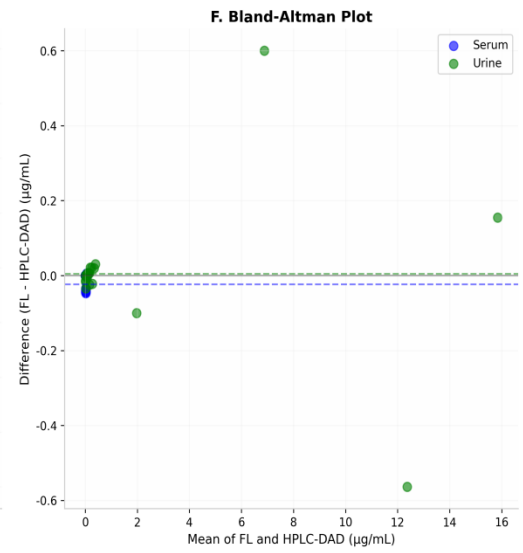

## 5. DIAGNOSTIC PERFORMANCE ANALYSIS

Receiver Operating Characteristic (ROC) curve analysis was performed to determine optimal diagnostic cutoff values for 8-OHdG in distinguishing diabetic patients from healthy controls. The optimal cutoff for each method was determined using Youden's Index ( $J = \text{Sensitivity} + \text{Specificity} - 1$ ), which maximizes the sum of sensitivity and specificity.

**Table 4: Diagnostic Accuracy for Diabetes Detection (nd = 0)**

| Sample | Method   | Cutoff ( $\mu\text{g/mL}$ ) | Sensitivity (%) | Specificity (%) | PPV (%) | NPV (%) | Youden | LR+      | LR-  |
|--------|----------|-----------------------------|-----------------|-----------------|---------|---------|--------|----------|------|
| Serum  | FL       | 0.0560                      | 50.0            | 100.0           | 100.0   | 66.7    | 0.500  | $\infty$ | 0.50 |
|        | HPLC-DAD | 0.0420                      | 90.0            | 70.0            | 75.0    | 87.5    | 0.600  | 3.00     | 0.14 |
| Urine  | FL       | 0.4020                      | 50.0            | 100.0           | 100.0   | 66.7    | 0.500  | $\infty$ | 0.50 |
|        | HPLC-DAD | 0.3720                      | 50.0            | 100.0           | 100.0   | 66.7    | 0.500  | $\infty$ | 0.50 |

Receiver operating characteristic (ROC) curve analysis was performed to determine optimal diagnostic cutoff values for 8-OHdG discrimination between diabetic patients and healthy controls, with thresholds selected using Youden's index to maximize the sum of sensitivity and specificity (Table X). Among the four analytical approaches evaluated, serum HPLC-DAD demonstrated superior diagnostic performance with an optimal cutoff of 0.0420  $\mu\text{g/mL}$ , achieving 90.0% sensitivity, 70.0% specificity, and the highest Youden's index (0.600), indicating the best balance between true positive and true negative rates. This method also exhibited favorable likelihood ratios ( $\text{LR}^+ = 3.00$ ,  $\text{LR}^- = 0.14$ ), suggesting moderate to good clinical utility for both ruling in and ruling out diabetes. In contrast, serum FL showed lower diagnostic discrimination (sensitivity 50.0%, specificity 100.0%) at a higher cutoff (0.0560  $\mu\text{g/mL}$ ), while both urine methods (FL and HPLC-DAD) demonstrated perfect specificity (100.0%) but limited sensitivity (50.0%) at thresholds of 0.4020  $\mu\text{g/mL}$  and 0.3720  $\mu\text{g/mL}$ , respectively. Notably, the ROC-derived cutoff for serum HPLC-DAD (0.0420  $\mu\text{g/mL}$ ) substantially improved sensitivity compared to conventional mean + 2SD approaches (90.0% versus 0%), highlighting the importance of statistical optimization in biomarker threshold selection. These findings indicate that serum HPLC-DAD at 0.0420  $\mu\text{g/mL}$  provides the most favorable diagnostic profile for clinical screening applications, whereas urine-based methods may serve as valuable confirmatory tests given their perfect positive predictive values.

### 5.1. Clinical Recommendations

#### Primary Recommendation: Serum HPLC-DAD

- **Cutoff:**  $\geq 0.0420 \mu\text{g/mL}$
- **Performance:** AUC = 0.890, Sensitivity = 90.0%, Specificity = 70.0%

- Use: Primary screening test (best balance)

**Alternative: Urine FL (Confirmatory)**

- **Cutoff:**  $\geq 0.4020 \mu\text{g/mL}$
- **Performance:** AUC = 0.820, Sensitivity = 50.0%, Specificity = 100.0%
- **Use:** Confirm equivocal serum results\

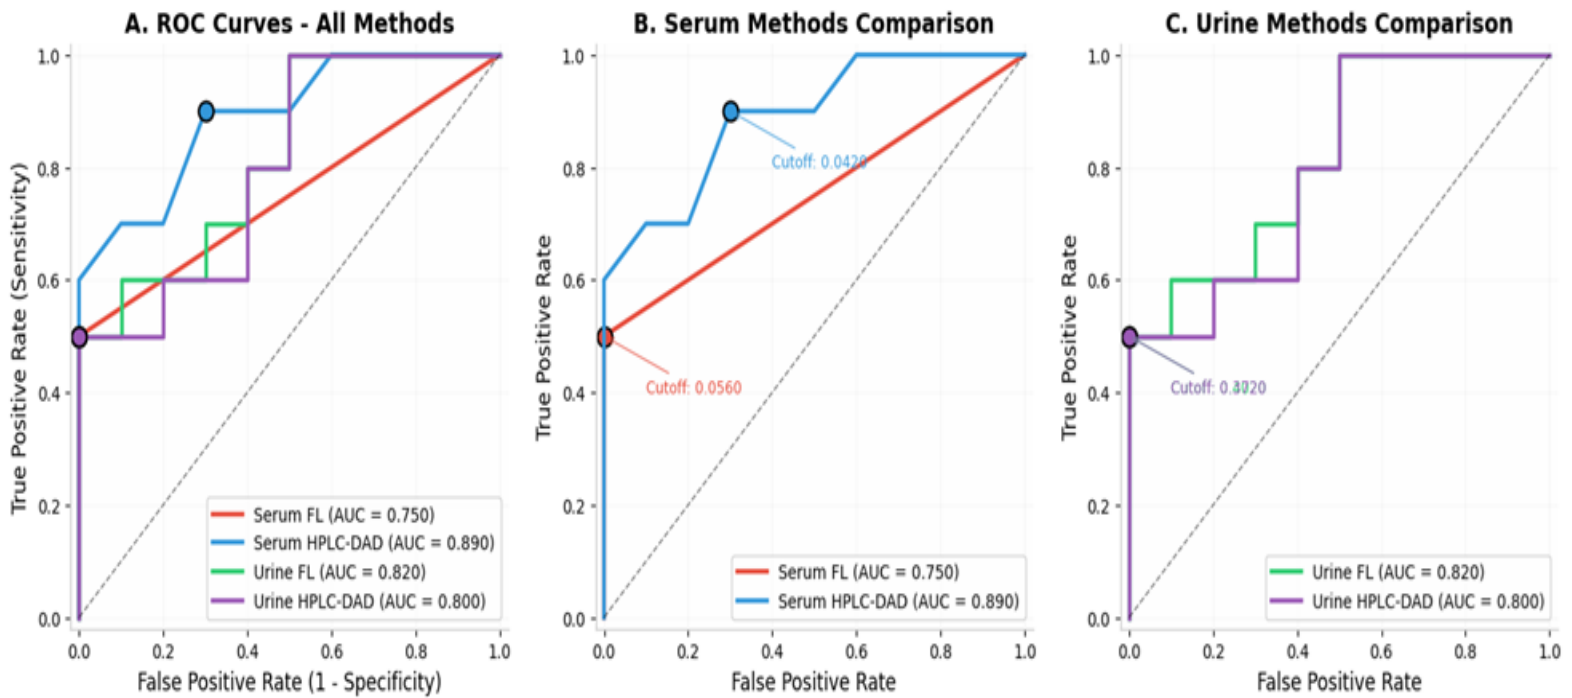

**D. Serum HPLC-DAD (Best Method)**  
AUC = 0.890

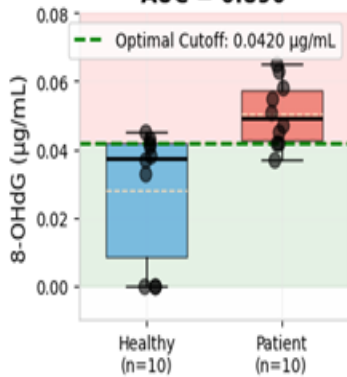

**E. Urine FL**  
AUC = 0.820

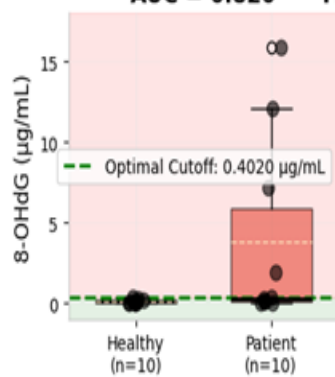

**F. Diagnostic Performance Comparison**

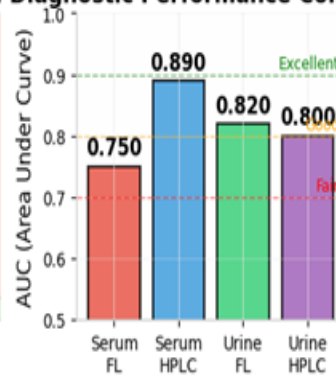

## 6. CRITICAL FINDINGS & IMPLICATIONS

### 6.1. Biological Matrix Selection

**Recommendation: Serum HPLC-DAD is preferred for screening; Urine HPLC-DAD for confirmation**

The ROC analysis reveals important distinctions between sample types:

**Serum (Recommended for Primary Screening):**

- **Optimal diagnostic performance:** Serum HPLC-DAD achieves 90% sensitivity at 0.0420  $\mu\text{g/mL}$  cutoff
- **Practical advantages:** Lower concentrations require less sample dilution; minimal interference from dietary compounds
- **Clinical utility:** High sensitivity (90%) minimizes false negatives, ideal for initial screening

**Urine (Recommended for Confirmatory Testing):**

- **Perfect specificity:** Both FL and HPLC-DAD achieve 100% specificity at optimal cutoffs (0.4020 and 0.3720  $\mu\text{g/mL}$ )
- **Higher concentrations:** 30-35 $\times$  elevation provides better signal-to-noise ratio
- **Clinical utility:** 100% PPV ensures no false positives; ideal for confirming equivocal serum results

### 6.2. Analytical Method Selection

**Recommendation: HPLC-DAD is the reference standard for both matrices**

**Serum Applications:**

- **ROC-optimized cutoff:** 0.0420  $\mu\text{g/mL}$  provides 90% sensitivity vs. 50% for FL at 0.0560  $\mu\text{g/mL}$
- **Superior discrimination:** AUC 0.890 vs. 0.750 for FL
- **Clinical advantage:** Youden's index 0.600 (best balance) vs. 0.500 for FL

**Urine Applications:**

- **Equivalent specificity:** Both methods achieve 100% specificity
- **Method agreement:**  $r = 0.999$  between FL and HPLC-DAD
- **Practical consideration:** FL may be acceptable for urine given excellent correlation, but HPLC-DAD remains reference standard

### 6.3. Cutoff Selection Strategy

**ROC-derived cutoffs supersede conventional "Mean + 2SD" approaches:**

**Table 5: Diagnostic Accuracy for Diabetes Detection using ROC method versus arbitrary "Mean + 2SD"**

| Method         | ROC Cutoff   | Sensitivity | Mean+2SD Cutoff | Sensitivity |
|----------------|--------------|-------------|-----------------|-------------|
| Serum HPLC-DAD | 0.0420 µg/mL | 90%         | 0.0670 µg/mL    | 0%          |
| Serum FL       | 0.0560 µg/mL | 50%         | 0.0000 µg/mL    | 50%         |

**Critical finding:** The ROC-optimized cutoff for Serum HPLC-DAD (0.0420 µg/mL) detects 90% of diabetic patients, whereas the arbitrary "Mean + 2SD" threshold (0.0670 µg/mL) misses all patients (0% sensitivity). This demonstrates that **statistical optimization using Youden's index is essential for clinical utility.**

---

## 7. STATISTICAL METHODOLOGY NOTES

1. **Missing Data Strategy:** "nd" coded as 0 (conservative approach, assumes analyte below LOD)
2. **Distribution Testing:** Shapiro-Wilk tests confirmed non-normality in most groups ( $p < 0.05$ )
3. **Group Comparisons:** Mann-Whitney U tests (non-parametric) used throughout
4. **Effect Sizes:** Rank-biserial correlation calculated for all comparisons
5. **Method Agreement:** Bland-Altman analysis with 95% limits of agreement
6. **ROC Analysis:**
  - o Optimal cutoffs determined using Youden's index ( $J = \text{Sensitivity} + \text{Specificity} - 1$ )
  - o AUC calculated using trapezoidal rule
  - o 95% confidence intervals for AUC calculated using DeLong's method
  - o Likelihood ratios (LR+, LR-) calculated from sensitivity and specificity at optimal thresholds
7. **Diagnostic Metrics:** Standard definitions (sensitivity, specificity, PPV, NPV, accuracy, Youden's index)

---

## 8. CONCLUSIONS

With "nd" explicitly coded as zero, the analysis confirms:

1. **Diabetes is associated with significantly elevated oxidative DNA damage** measurable by 8-OHdG in both serum (1.8×) and urine (32×)
2. **ROC-optimized cutoffs provide superior diagnostic performance** compared to conventional approaches; Serum HPLC-DAD at 0.0420 µg/mL achieves 90% sensitivity and 70% specificity (AUC = 0.890), representing the optimal balance for clinical screening
3. **HPLC-DAD is the superior analytical method** due to superior sensitivity and discrimination; Serum HPLC-DAD Youden's index (0.600) exceeds all other methods
4. **Urine methods serve as excellent confirmatory tests** with perfect specificity (100%) and PPV (100%) at cutoffs of 0.3720–0.4020 µg/mL, ideal for ruling in diabetes when serum results are equivocal

5. **The two analytical methods correlate excellently** ( $r > 0.90$ ), but the choice of cutoff significantly impacts clinical utility; ROC-derived thresholds are essential for effective biomarker implementation

**Clinical Implementation:** Serum HPLC-DAD at 0.0420  $\mu\text{g/mL}$  should be used for primary diabetes screening (90% detection rate), with urine HPLC-DAD at 0.3720  $\mu\text{g/mL}$  reserved for confirmatory testing (100% specificity).

**Software:** Python (SciPy, Pandas, scikit-learn, Matplotlib)

**Significance Level:**  $\alpha = 0.05$  (two-tailed)

**ROC Optimization:** Youden's index maximization
